# Supplementary material for: Versatile pyridine-2,6-bis-tetrazolate scaffolds for the formation of highly luminescent lanthanide complexes
Source: Royal Society of Chemistry journal article supplement (doi:10.1039/c5dt04811g), 2016-01-01
Supplement: c5dt04811g1.pdf [file c5dt04811g1.pdf]

## SUPPORTING INFORMATION

### **Versatile pyridine-2,6-bis-tetrazolate scaffolds for the formation of highly luminescent lanthanide complexes**

**Sebastiano Di Pietro,<sup>a</sup> Nicholas Gautier,<sup>a</sup> Jacques Pécaut,<sup>a</sup> Daniel Imbert,<sup>\*a</sup> Jacques Pécaut<sup>a</sup> and Marinella Mazzanti.<sup>\*b</sup>**

*a Univ. Grenoble Alpes, INAC-SCIB, RICC, F-38000 Grenoble, France ; CEA, INAC-SCIB, F-38000 Grenoble, France;*  
*b Institut des Sciences et Ingénierie Chimique, Ecole Polytechnique Fédérale de Lausanne (EPFL)  
CH-1015 Lausanne (Switzerland) E-mail: [marinella.mazzanti@epfl.ch](mailto:marinella.mazzanti@epfl.ch); [daniel.imbert@cea.fr](mailto:daniel.imbert@cea.fr)*

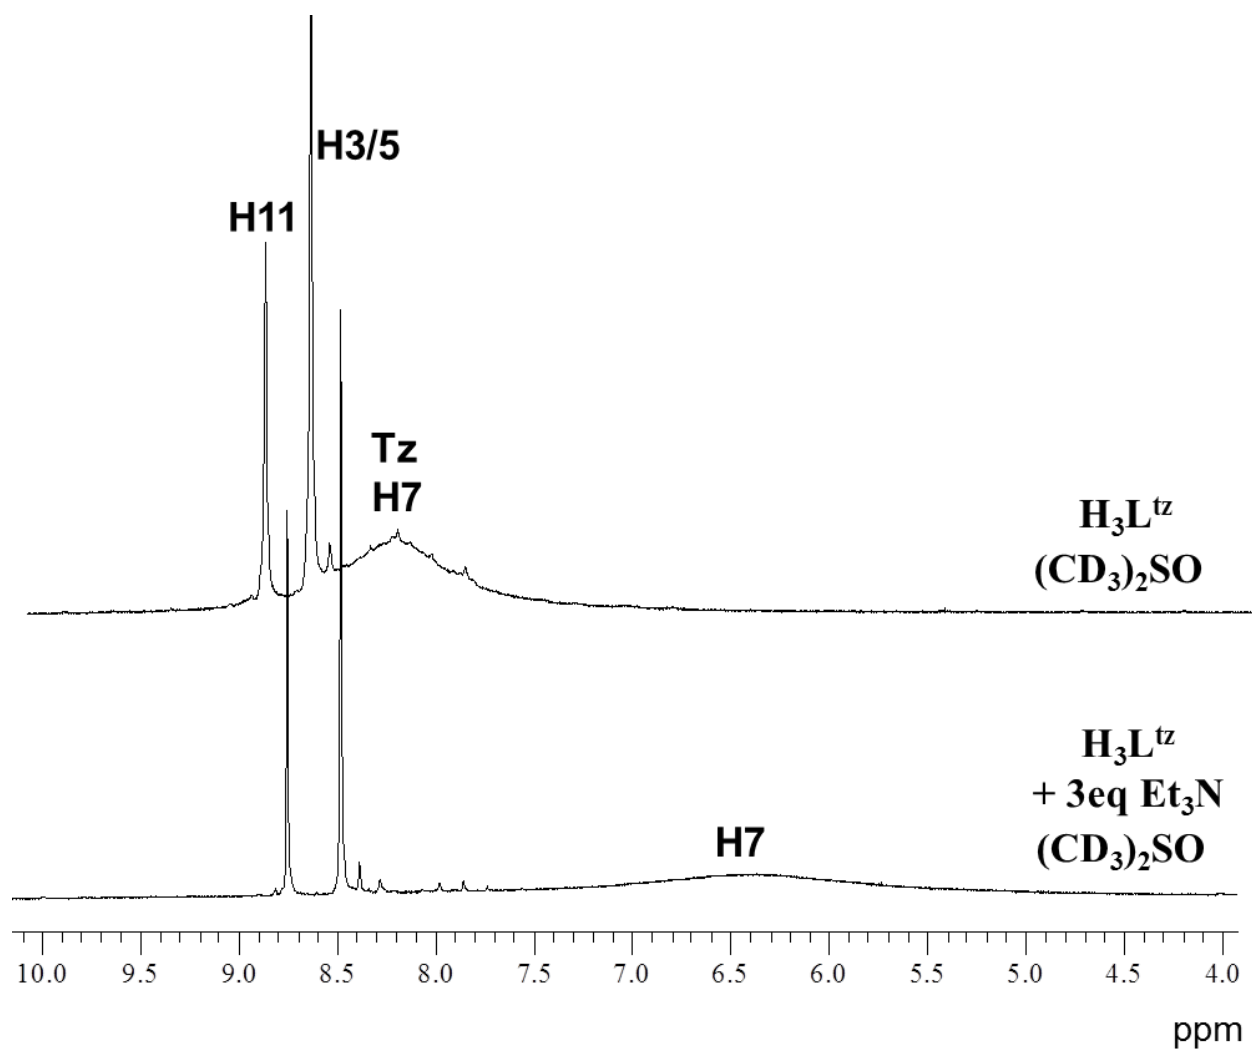

Figure S 1.  $^1\text{H}$  NMR spectra (200 MHz) of  $\text{H}_3\text{L}^{\text{tz}}$  in  $\text{DMSO}_d_6$ .

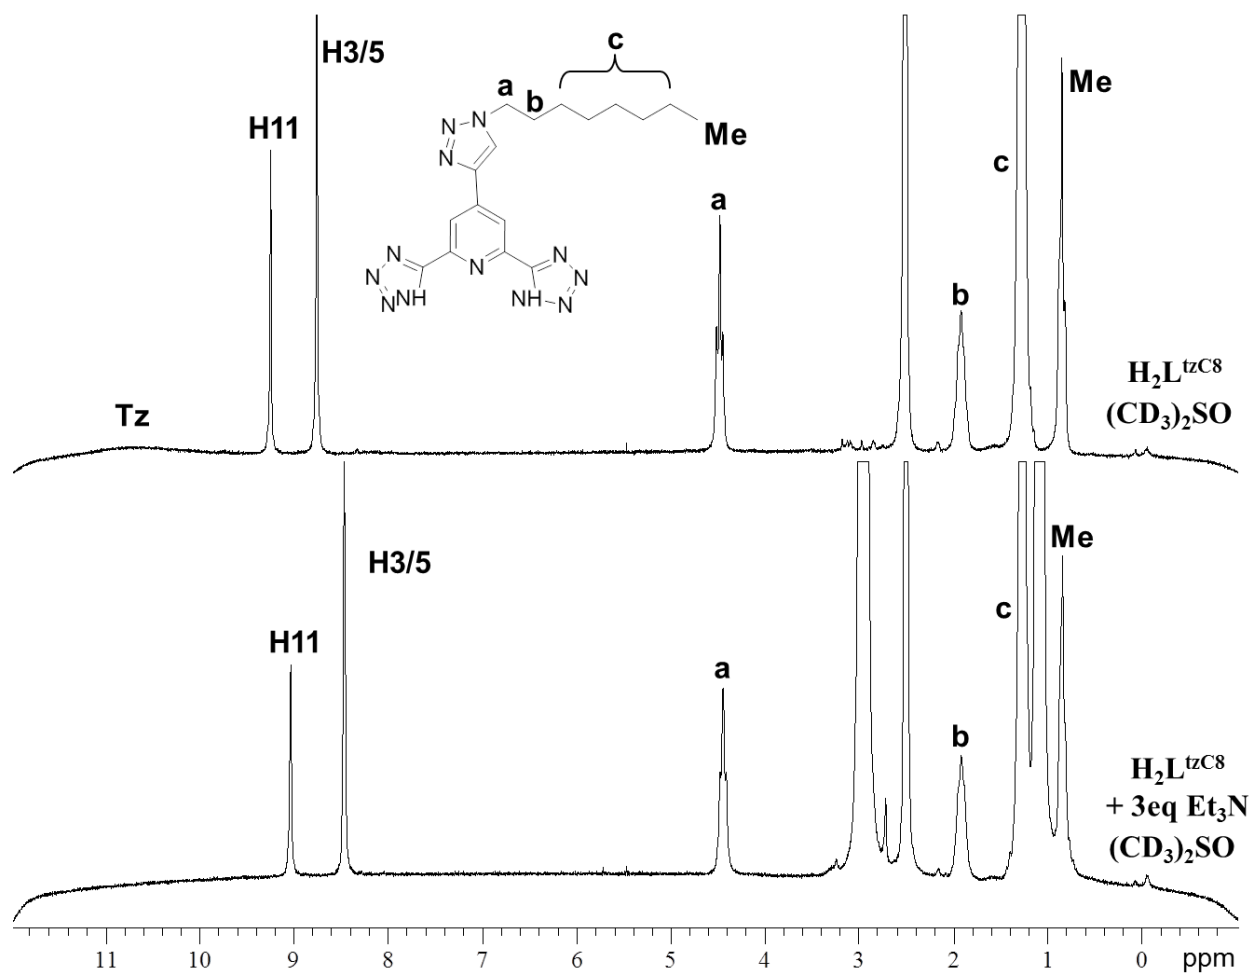

Figure S 2.  $^1\text{H}$  NMR spectra (200 MHz)  $\text{H}_2\text{L}^{\text{tzC8}}$  in  $\text{DMSO-d}_6$ .

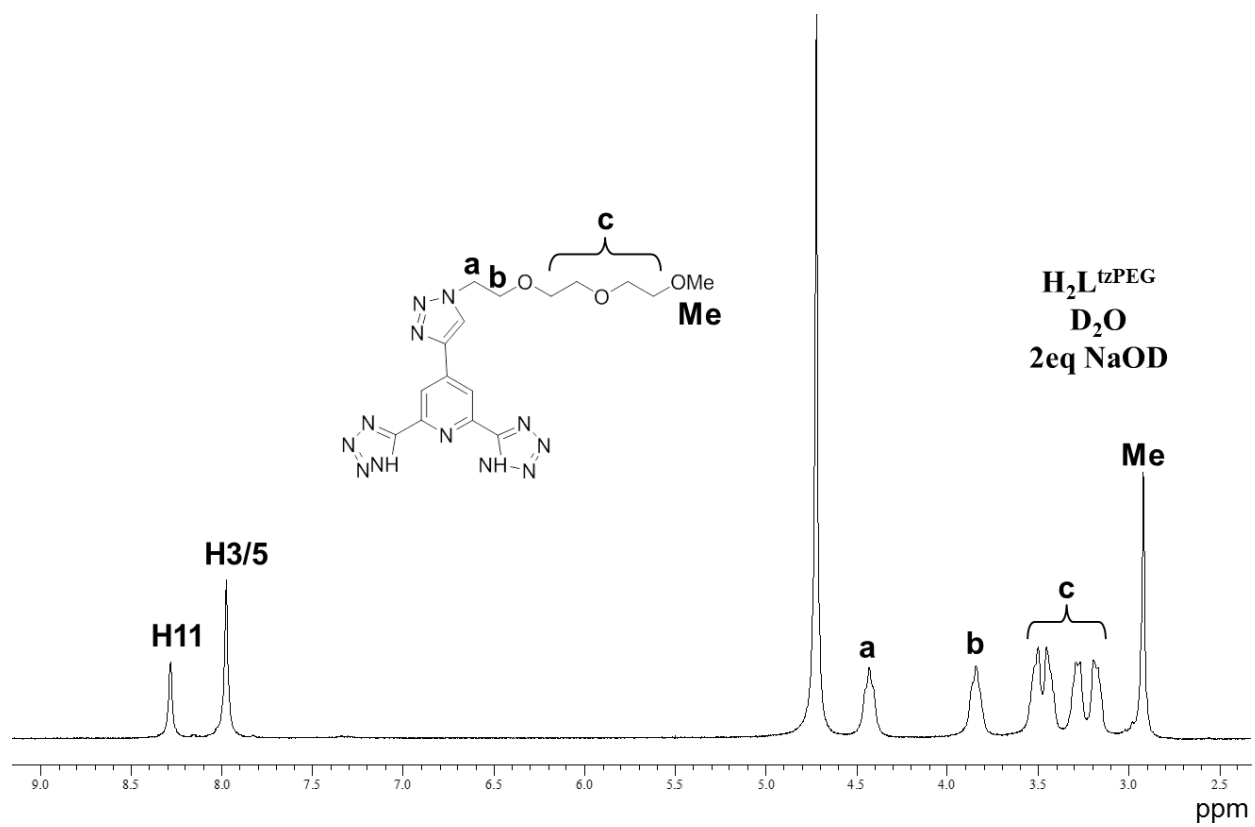

Figure S 3.  $^1\text{H}$  NMR spectrum (200 MHz) of  $\text{H}_2\text{L}^{\text{tzPEG}}$  in  $\text{D}_2\text{O}$ .

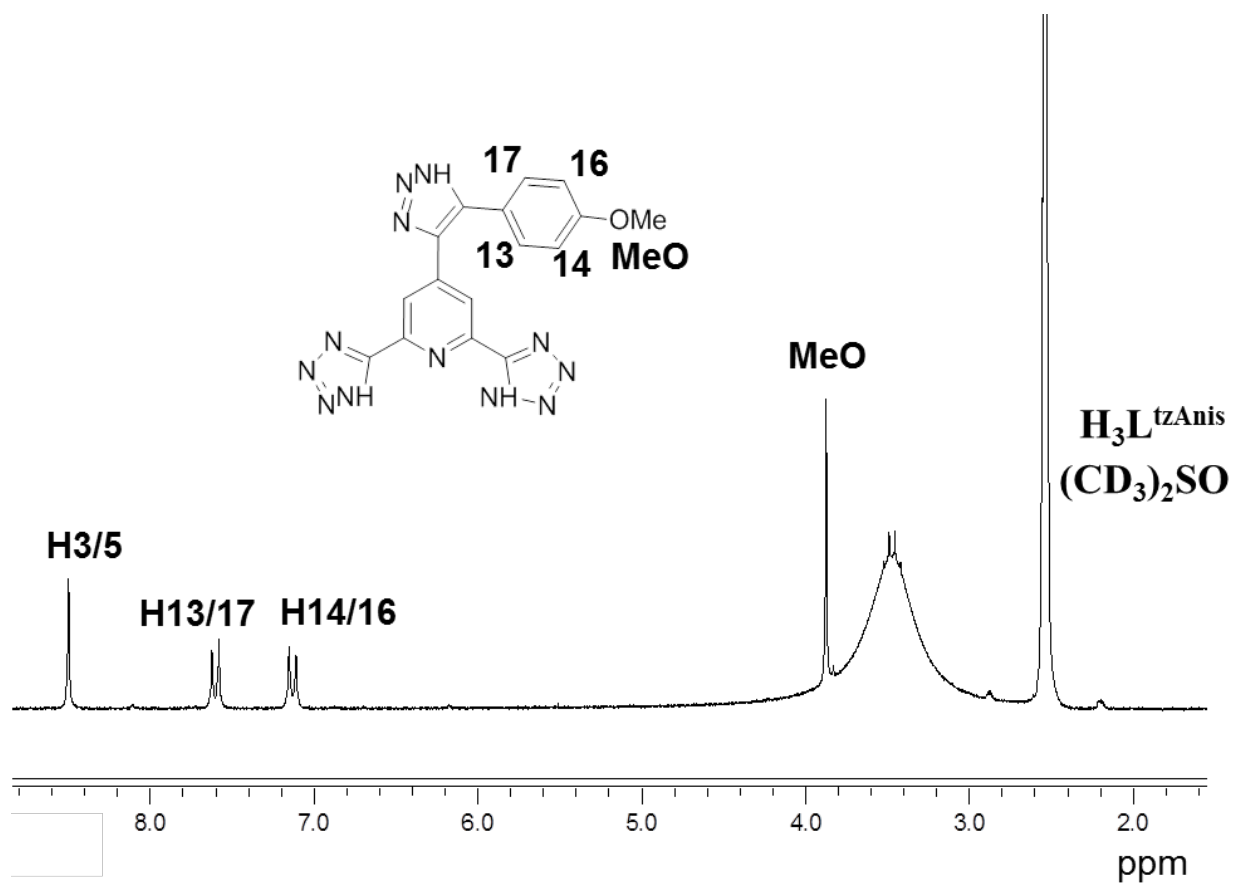

Figure S 4.  $^1\text{H}$  NMR spectrum (200 MHz) of  $\text{H}_3\text{L}^{\text{tzAnis}}$  in  $\text{DMSO-d}_6$

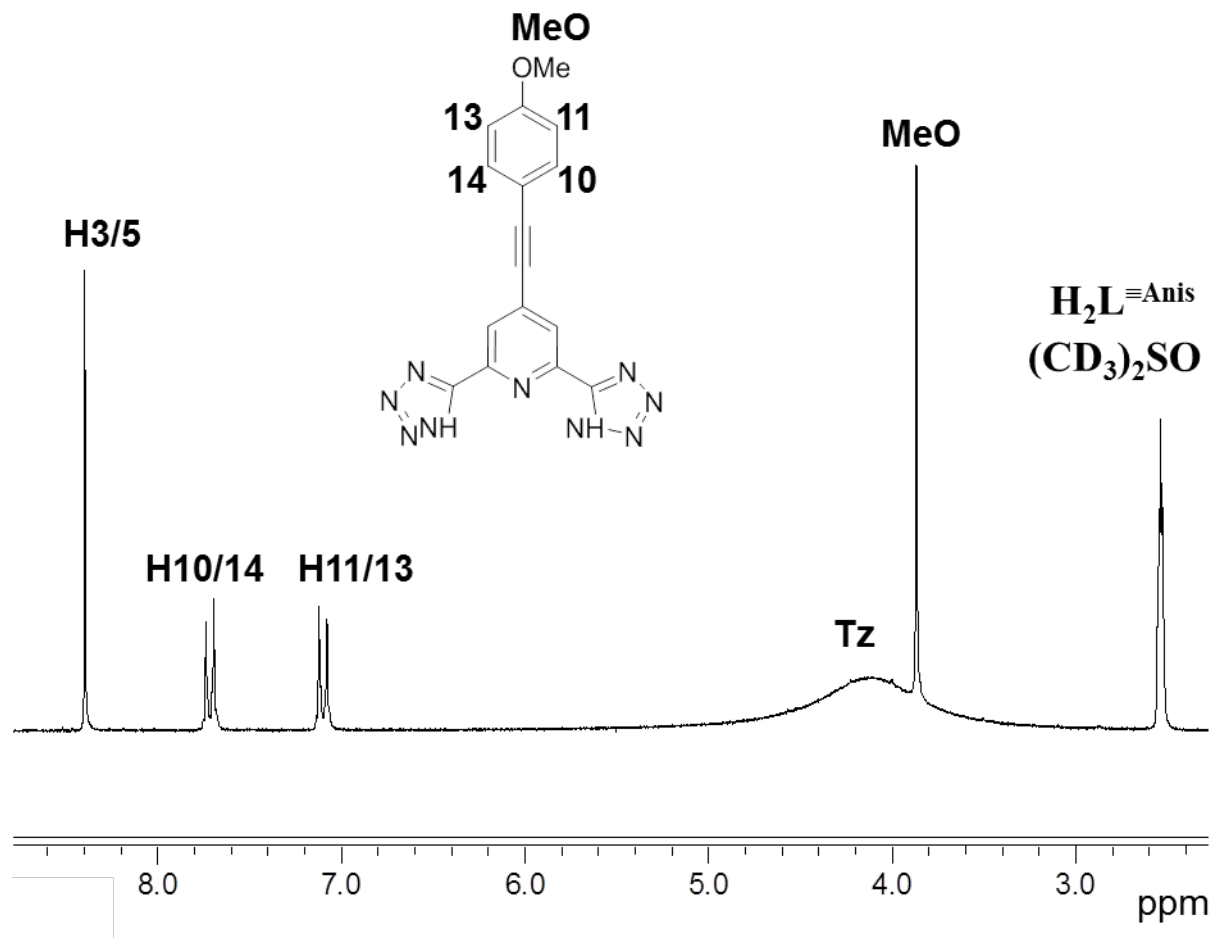

Figure S 5.  $\text{H}_2\text{L}_5$   $^1\text{H}$  NMR spectrum (200 MHz) of  $\text{H}_2\text{L}^{\equiv\text{Anis}}$  in  $\text{DMSO-d}_6$ .

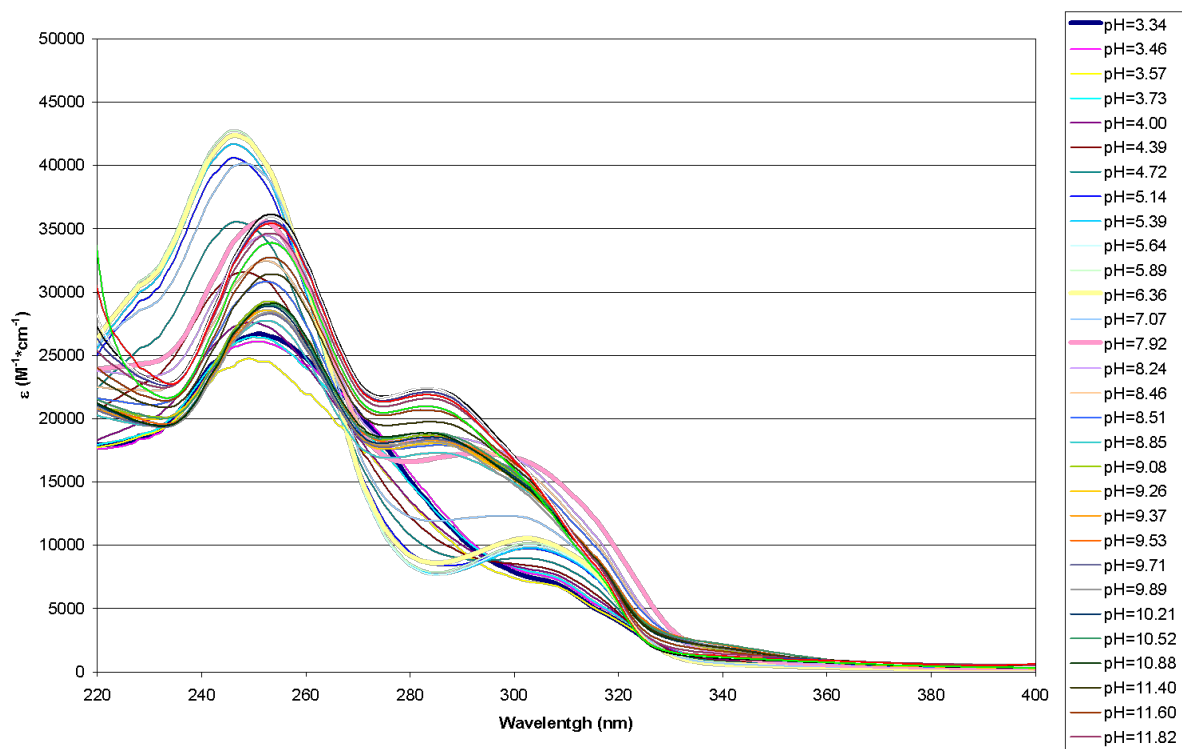

Figure S 6. UV-Vis absorption spectra of  $L^{tz}$  ( $2.5 \times 10^{-5} \text{ M}$ ) as a function of pH,  $I = 1 \text{ M}$  (KCl) in water.

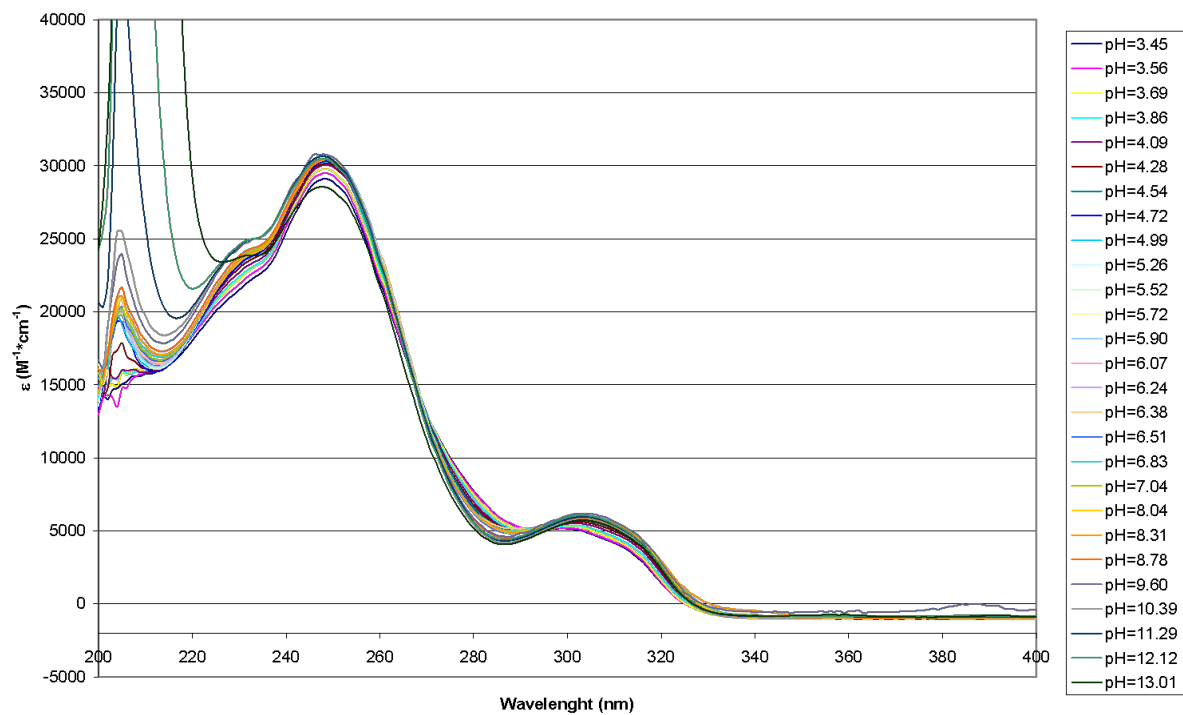

Figure S 7. UV-Vis absorption spectra of  $L^{tzPEG}$  ( $2.5 \times 10^{-5} M$ ) as a function of pH,  $I = 1M$  (KCl) in water.



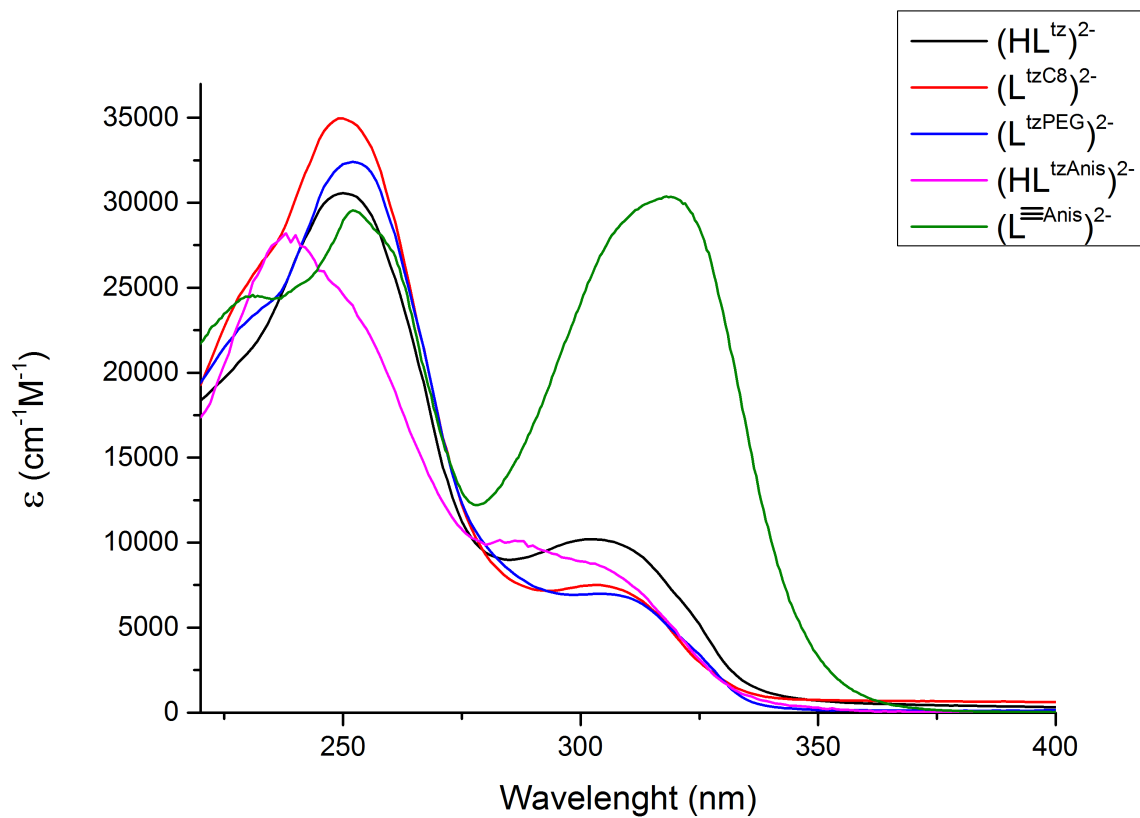

Figure S 8. Calculated extinction coefficient spectra of all the ligands ( $2.5 \cdot 10^{-5}\text{M}$ ),  $I = 1\text{M}$  (TMACl) in MeOH.

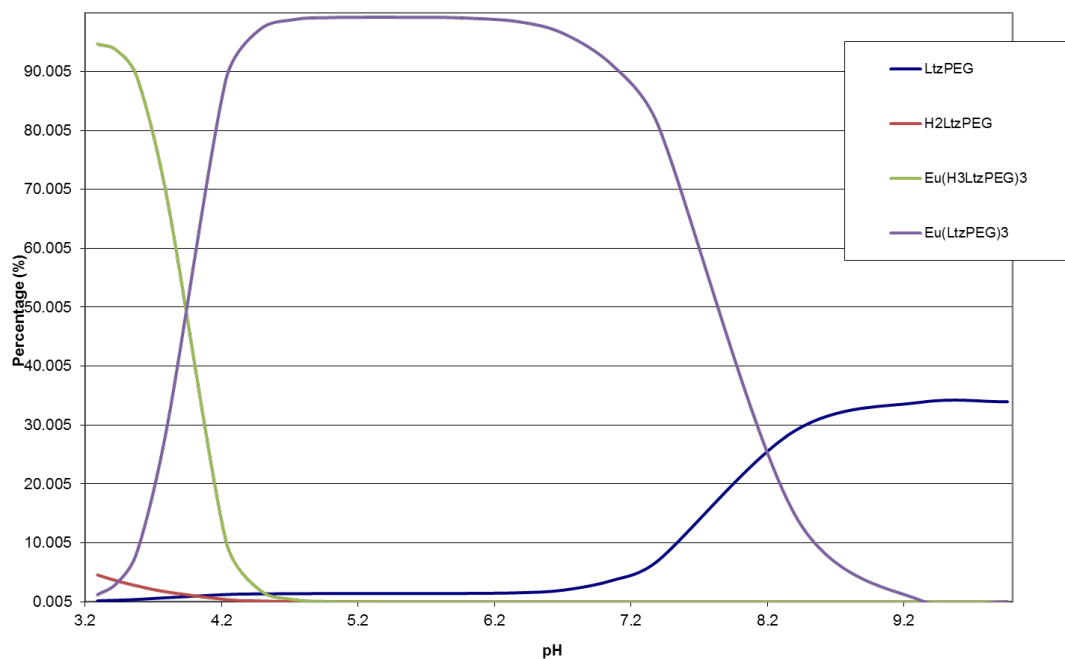

Figure S 9. Species distribution curves for  $[\text{Eu}(\text{L}^{\text{tzPEG}})_3][\text{Et}_3\text{NH}]_3$  as a function of pH.

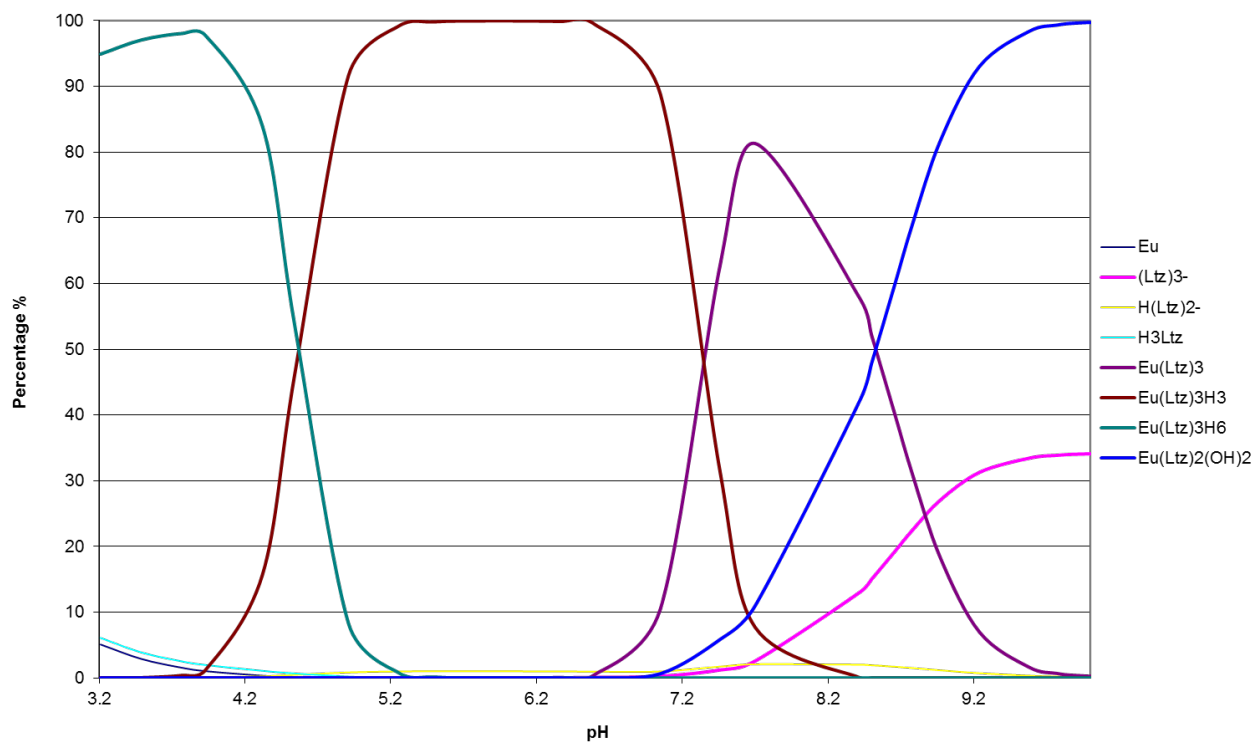

Figure S 10. Species distribution curves for  $[\text{Eu}(\text{HL}^{\text{tz}})_3][\text{Et}_3\text{NH}]_3$  in function of the pH.

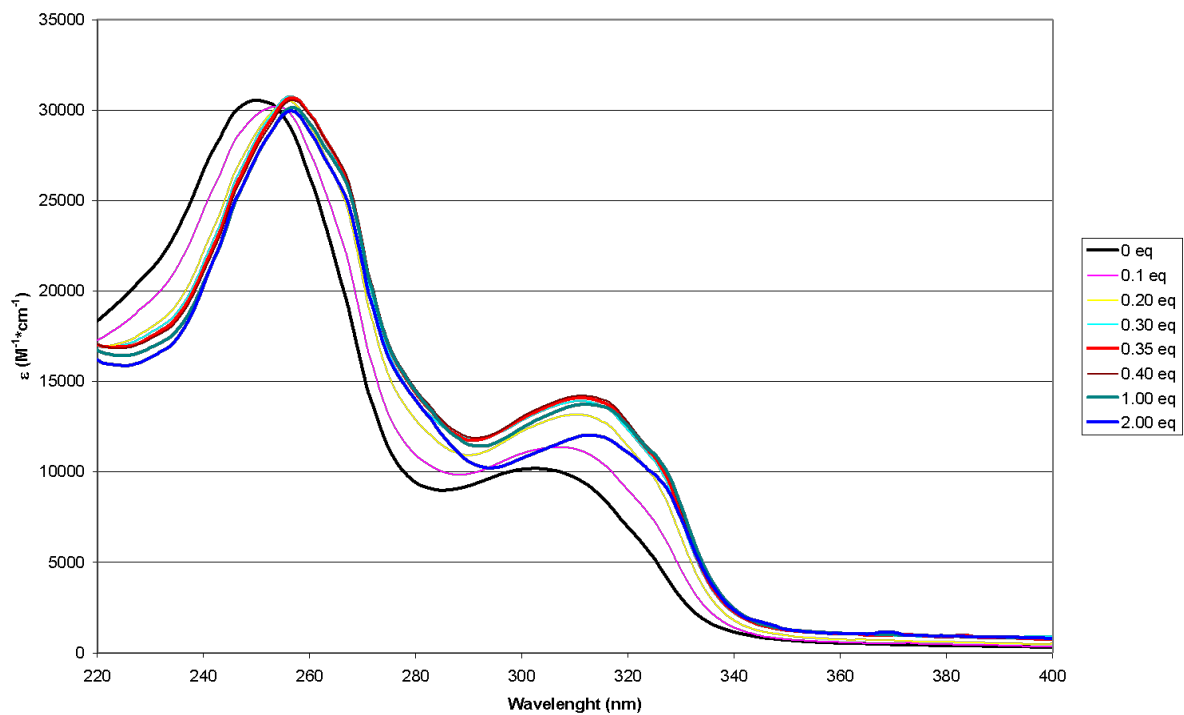

Figure S 11. Titration of  $L^{tz}$  ( $2.5 \cdot 10^{-5} M$ ) with europium triflate,  $I = 1 M$  (TMACl) in MeOH.

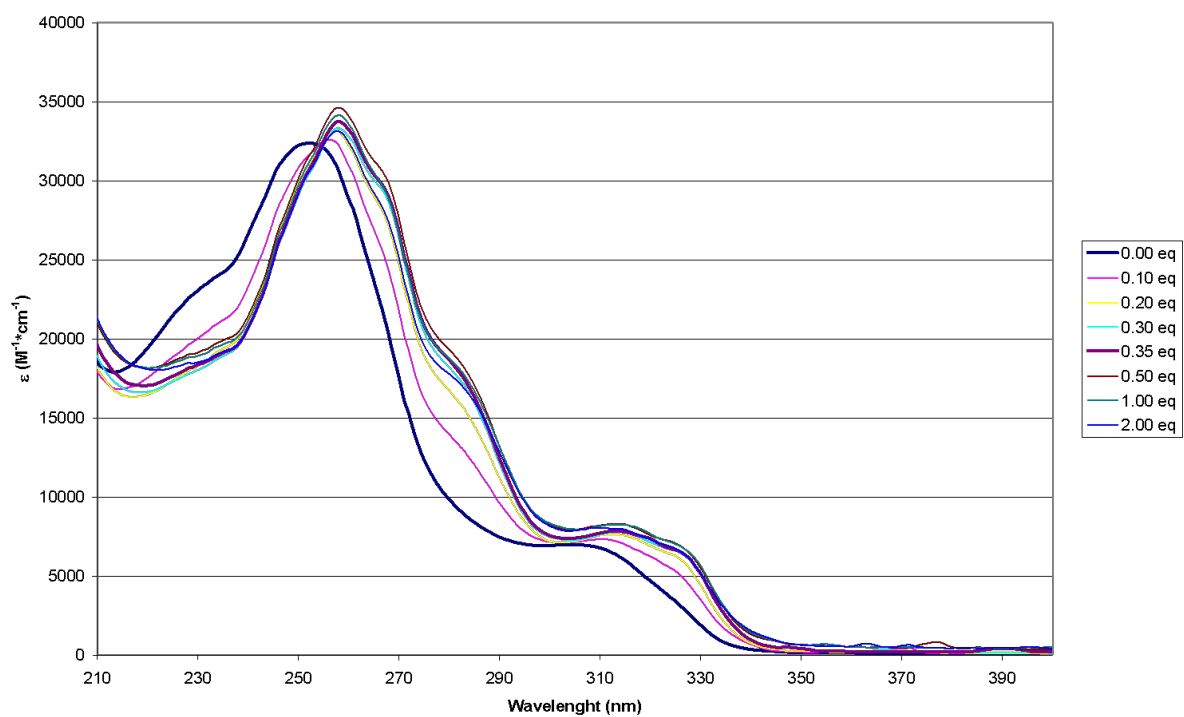

Figure S 12. Titration of  $L^{tzC8}$  ( $2.5 \cdot 10^{-5} M$ ) with europium triflate,  $I = 1 M$  (TMACl) in MeOH.

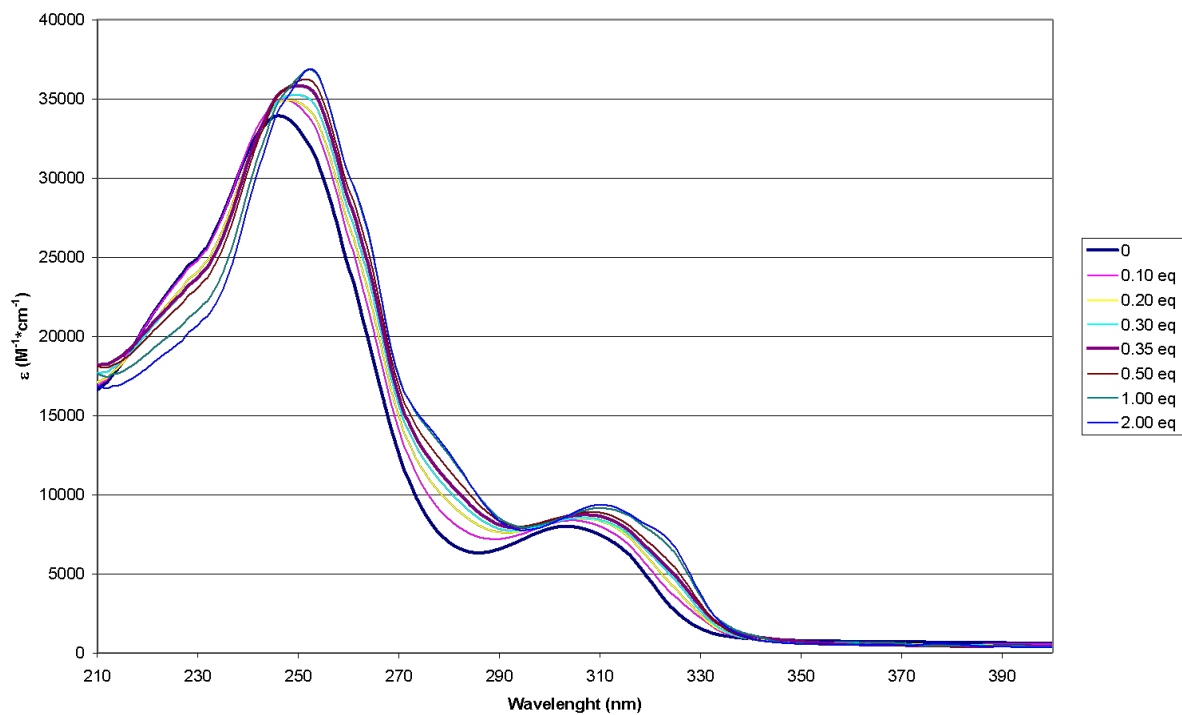

Figure S 13. Titration of  $L^{tz}$  ( $2.5 \cdot 10^{-5} M$ ) with europium triflate in MES buffer.

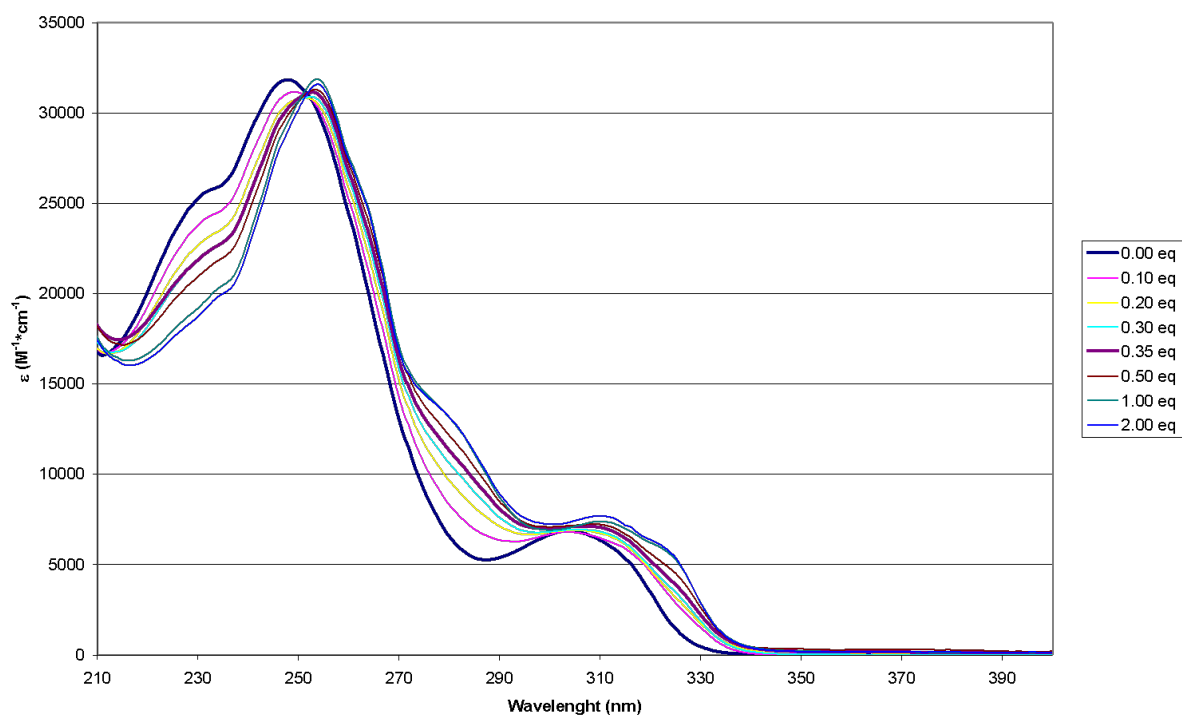

Figure S 14. Titration of  $L^{tzPEG}$  ( $2.5 \cdot 10^{-5} M$ ) with europium triflate in water MES buffer.

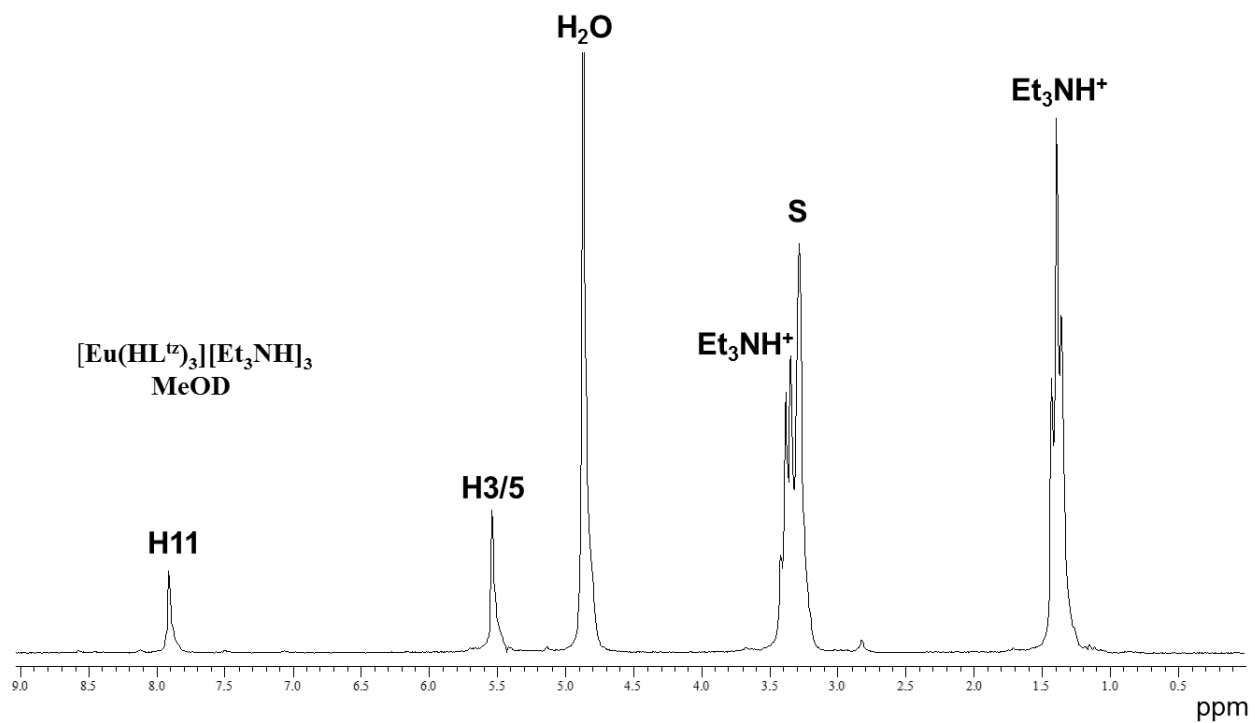

Figure S 15.  $^1\text{H}$  NMR spectrum of  $[\text{Eu}(\text{HL}^{\text{tz}})_3][\text{Et}_3\text{NH}]_3$  in  $\text{CD}_3\text{OD}$  (200 MHz).

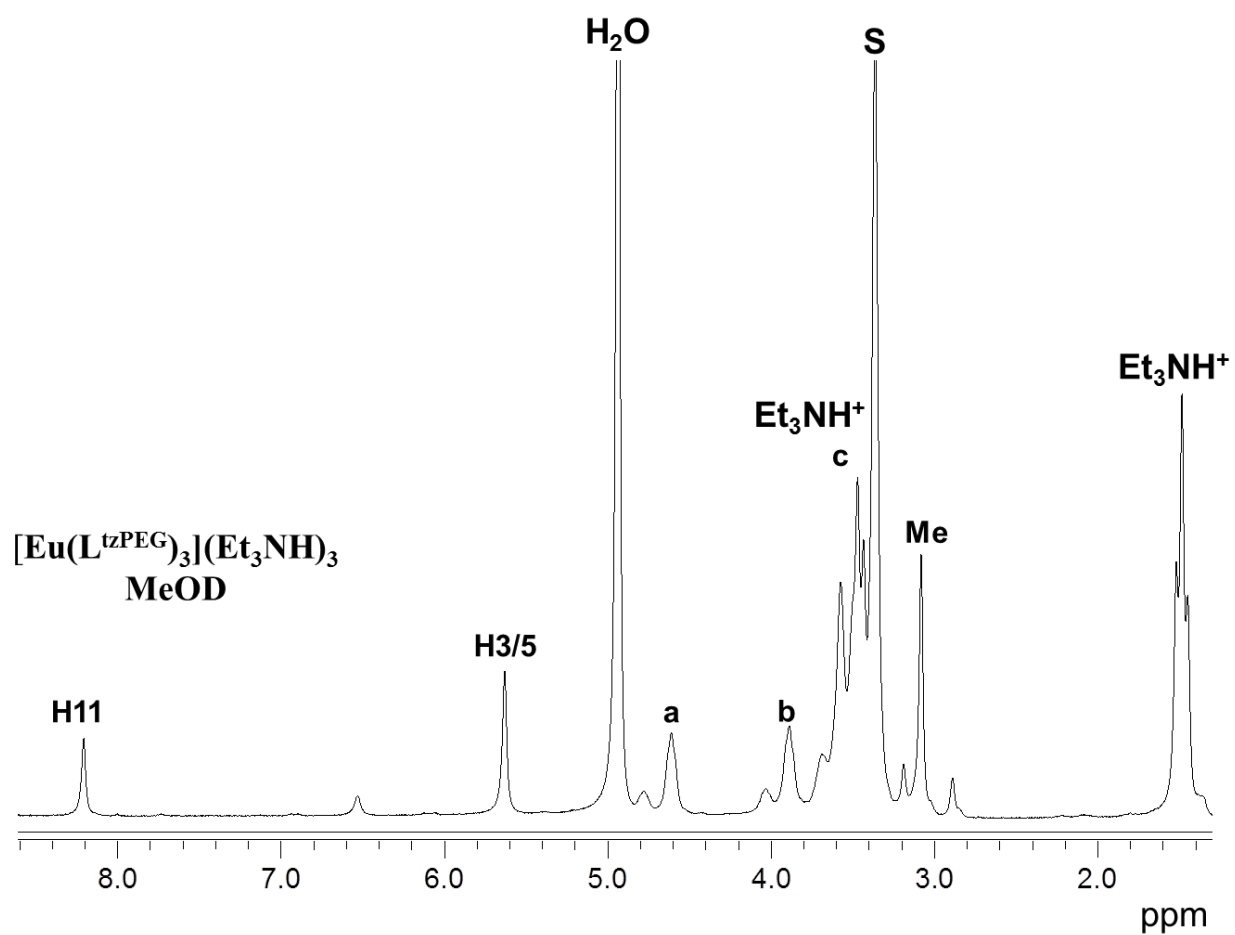

Figure S 16. <sup>1</sup>H NMR spectrum of [Eu(L<sup>tzPEG</sup>)<sub>3</sub>][Et<sub>3</sub>NH]<sub>3</sub> <sup>1</sup>H NMR spectrum in CD<sub>3</sub>OD (200 MHz).

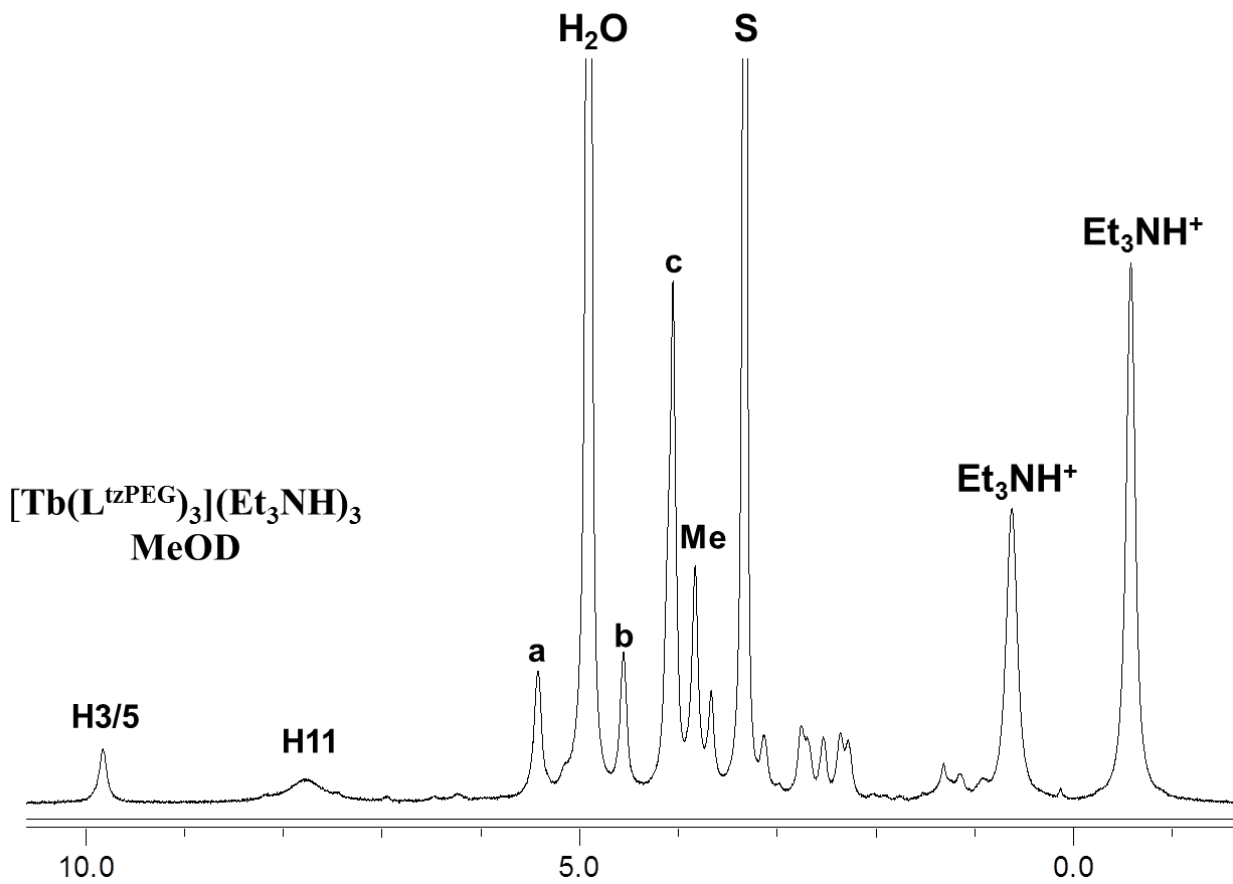

Figure S 17. <sup>1</sup>H NMR spectrum of [Tb(L<sup>tzPEG</sup>)<sub>3</sub>](Et<sub>3</sub>NH)<sub>3</sub> in CD<sub>3</sub>OD (200 MHz).

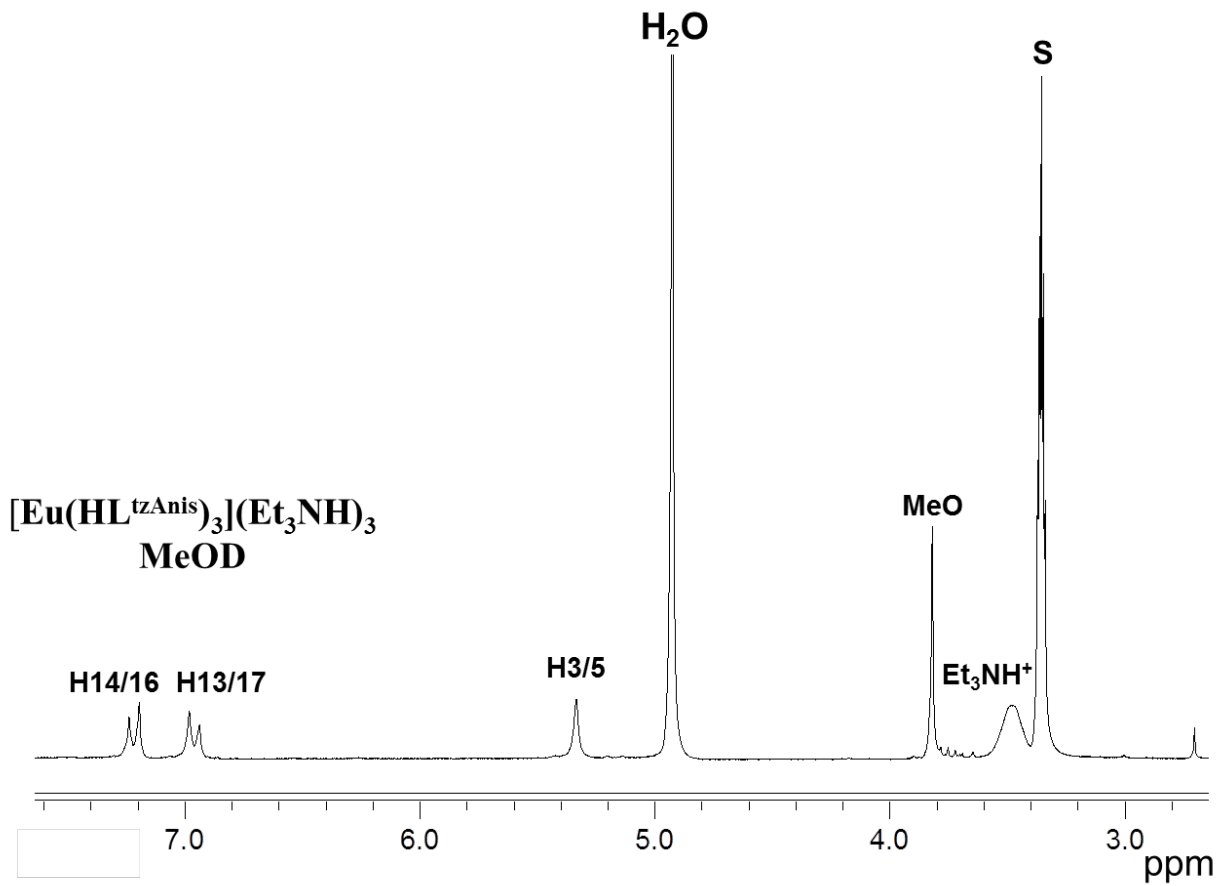

Figure S 18. <sup>1</sup>H NMR spectrum of [Eu(HL<sup>tzAnis</sup>)<sub>3</sub>](Et<sub>3</sub>NH)<sub>3</sub> in CD<sub>3</sub>OD (200 MHz).



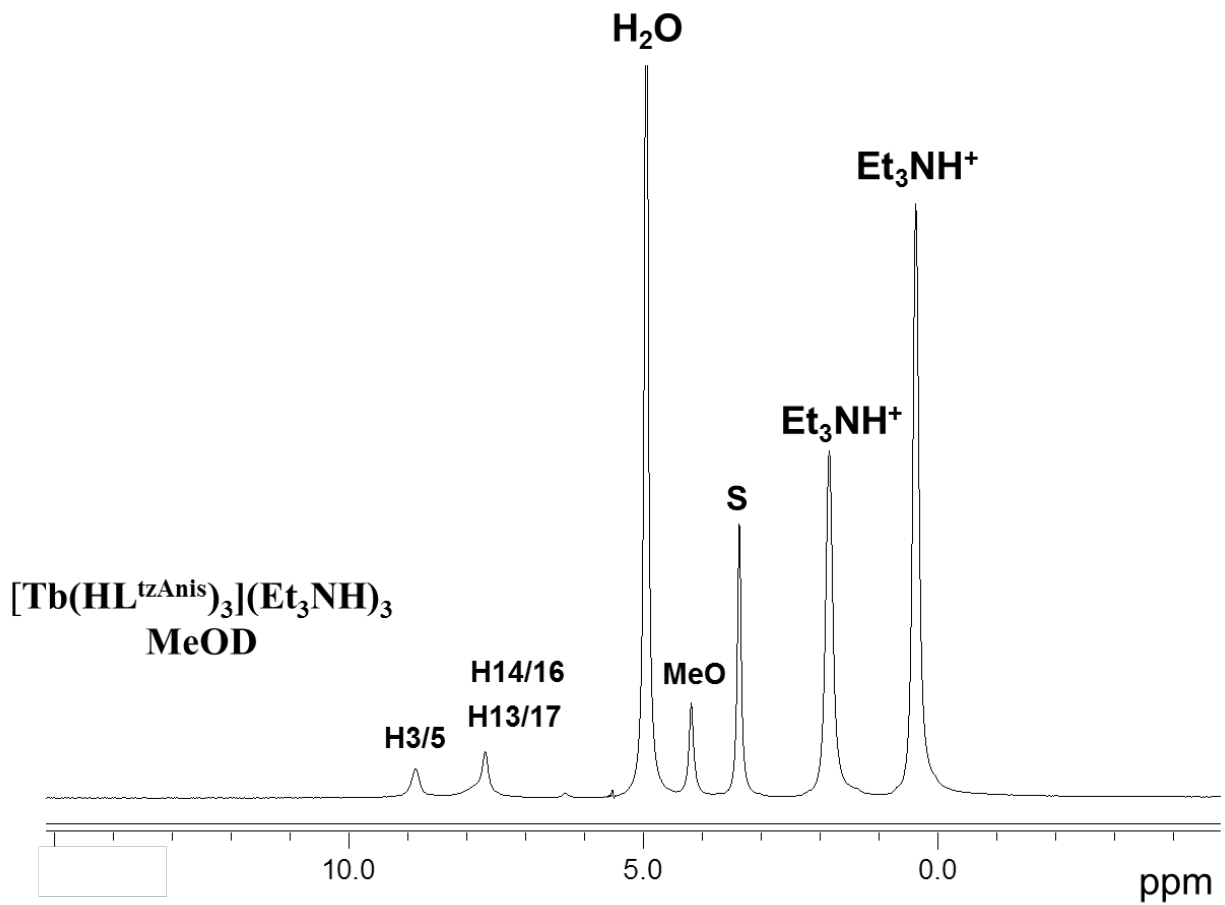

Figure S 19. <sup>1</sup>H NMR spectrum of [Tb(HL<sup>tzAnis</sup>)<sub>3</sub>][Et<sub>3</sub>NH]<sub>3</sub> in CD<sub>3</sub>OD (200 MHz).

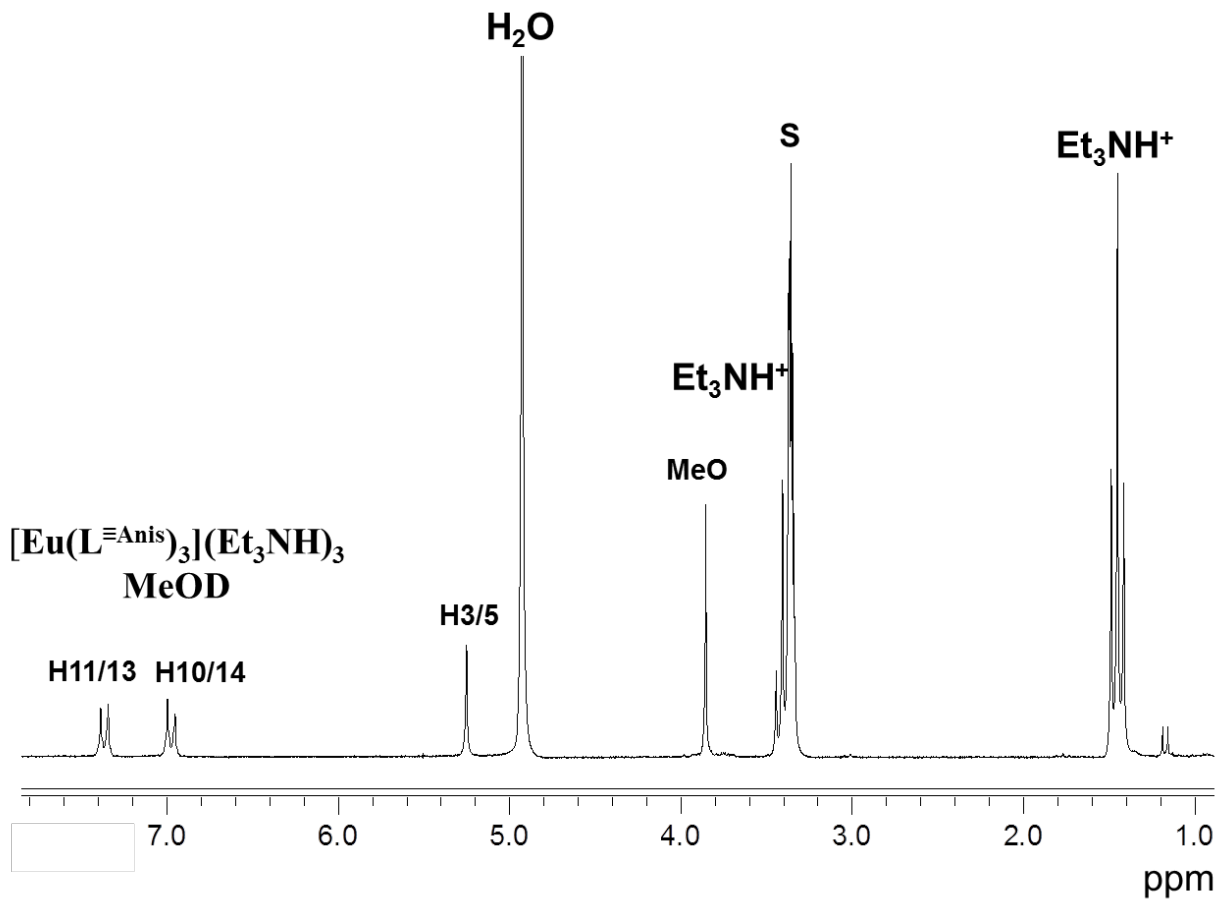

Figure S 20. <sup>1</sup>H NMR spectrum of [Eu(L<sup>≡</sup>Anis)<sub>3</sub>](Et<sub>3</sub>NH)<sub>3</sub> in CD<sub>3</sub>OD (200 MHz).

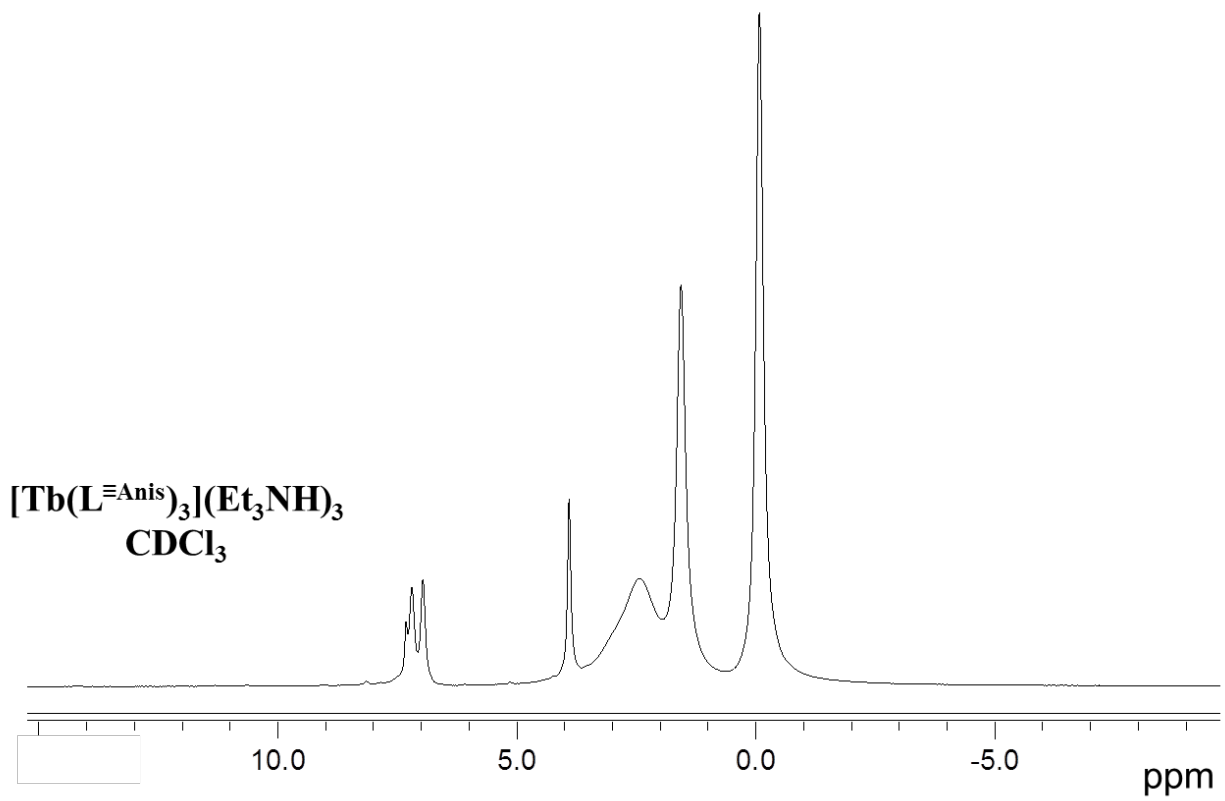

Figure S 21.  $^1\text{H}$  NMR spectrum of  $[\text{Tb}(\text{L}^{\equiv\text{Anis}})_3](\text{Et}_3\text{NH})_3$  in  $\text{CD}_3\text{OD}$  (200 MHz).

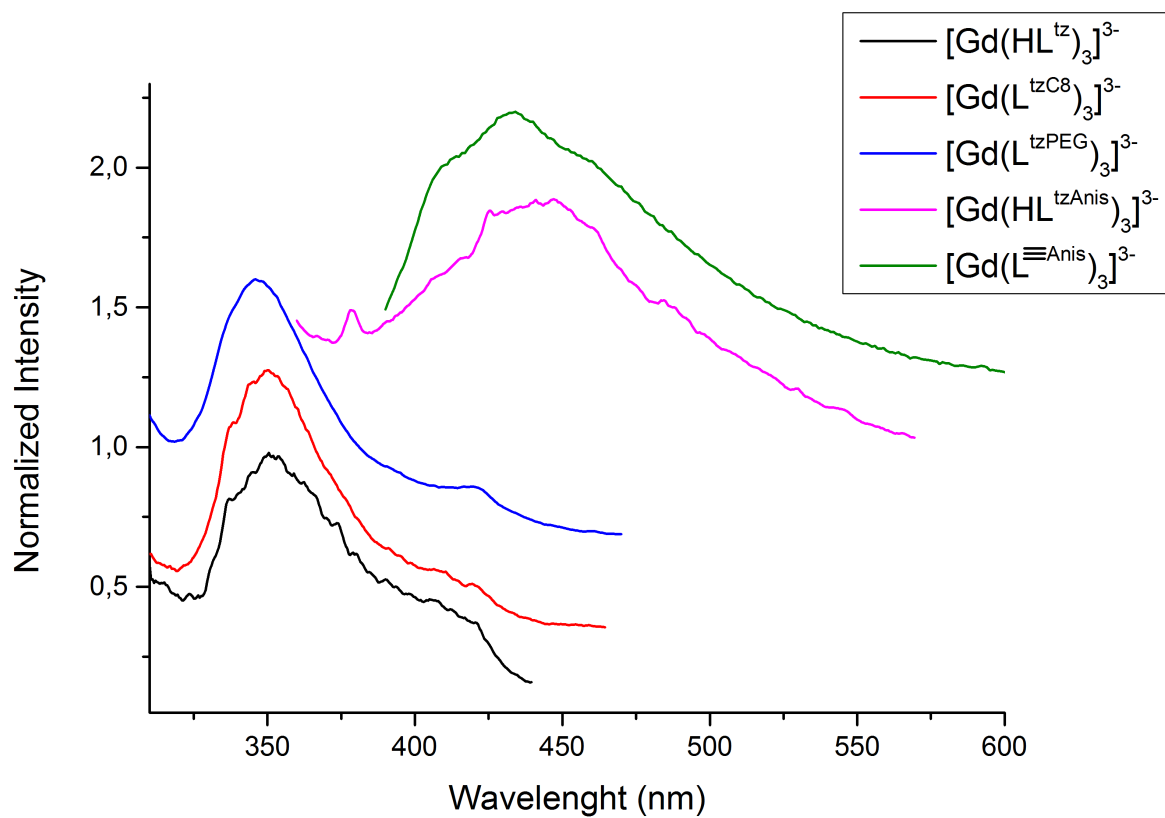

Figure S 22. Normalized emission spectra (singlet state) of the gadolinium complexes of all the ligands in MeOH.

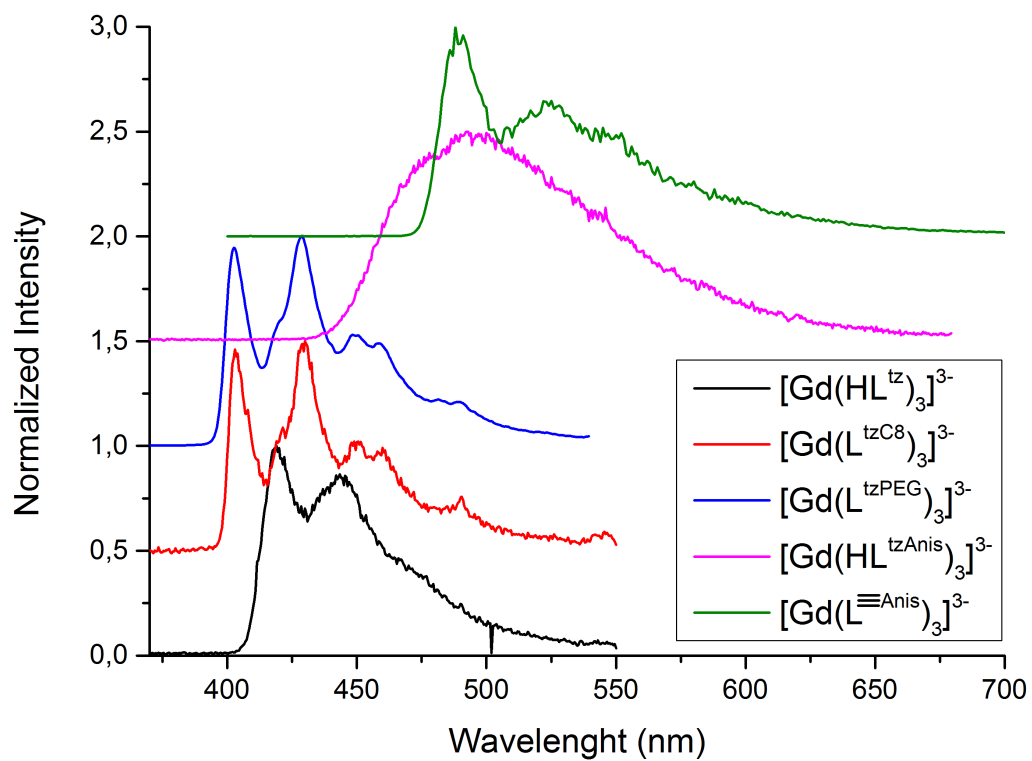

Figure S 23. Normalized emission spectra (triplet state) of the gadolinium complexes of all the ligands upon enforcement of a time delay (0.2 ms), in MeOH at 77 K

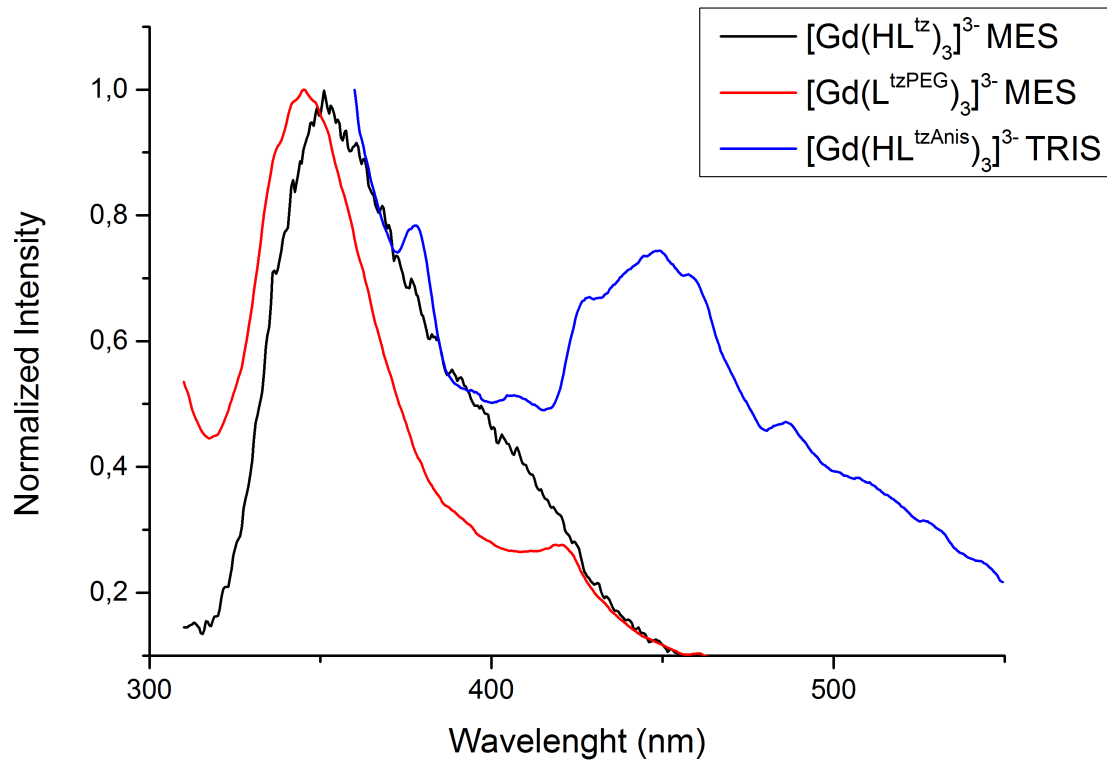

Figure S 24. Normalized emission spectra (singlet state) in water of the gadolinium complexes of  $\text{L}^{\text{tz}}$ ,  $\text{L}^{\text{tzPEG}}$  and  $\text{L}^{\text{tzAnis}}$ .

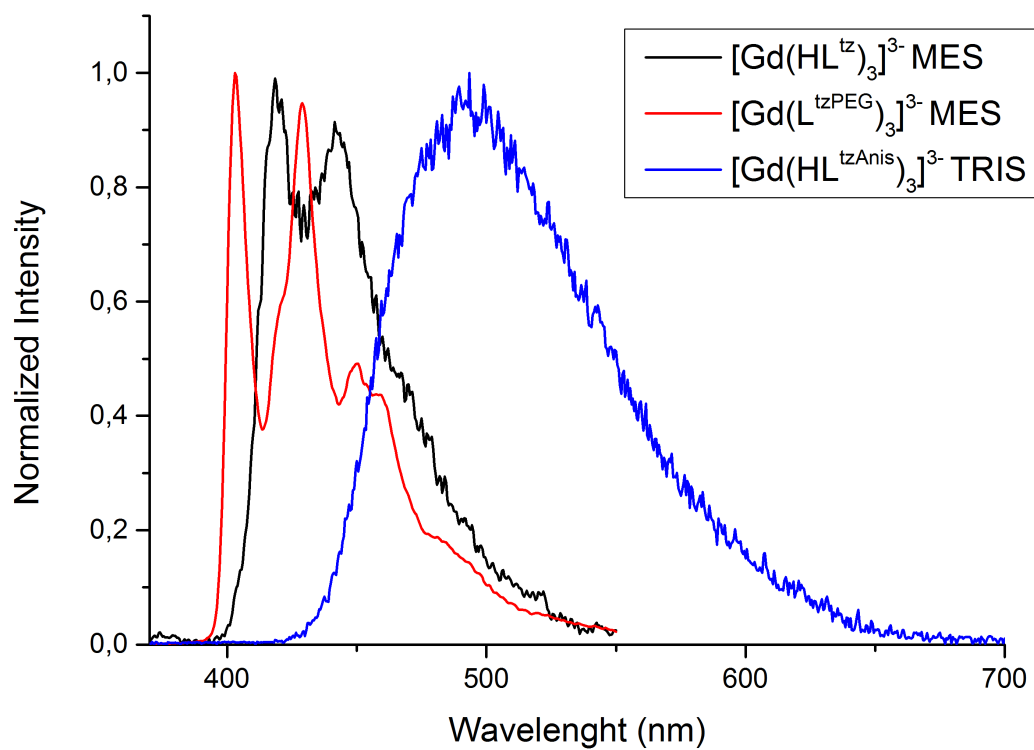

Figure S 25. Normalized emission spectra (triplet state) in water at 77K of the gadolinium complexes of  $\text{L}^{\text{tz}}$ ,  $\text{L}^{\text{tzPEG}}$  and  $\text{L}^{\text{tzAnis}}$  upon enforcement of a time delay (0.2 ms).

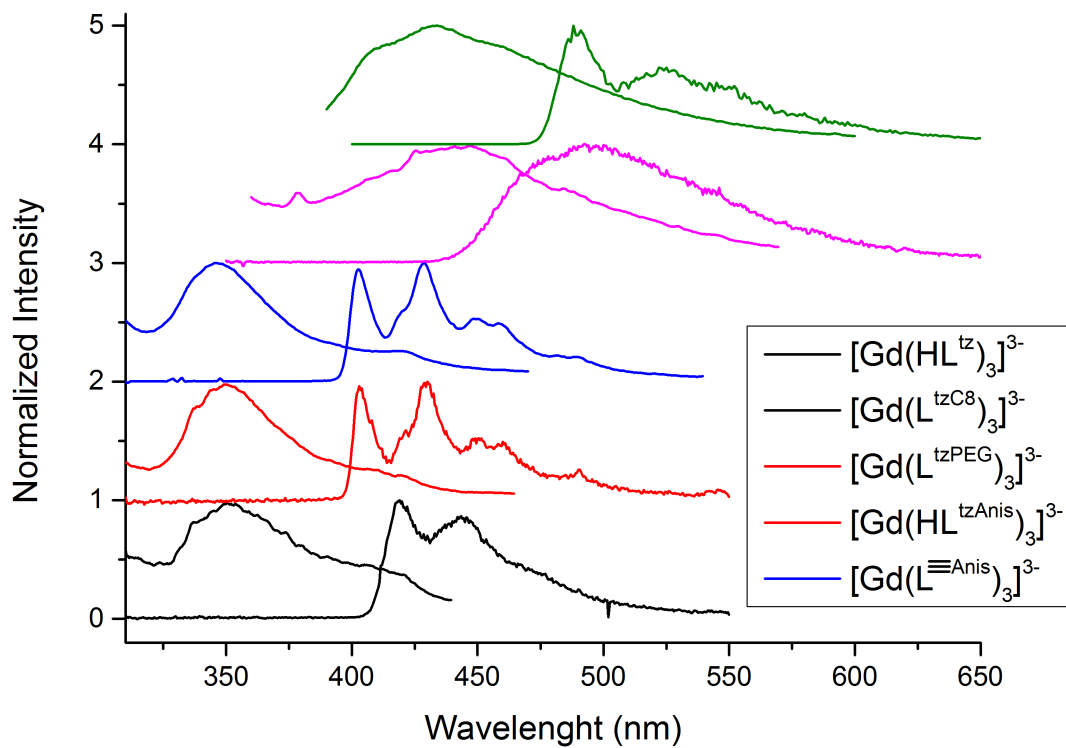

Figure S 26. Overall singlet/triplet state comparison for the gadolinium complexes of all the ligands in methanol.



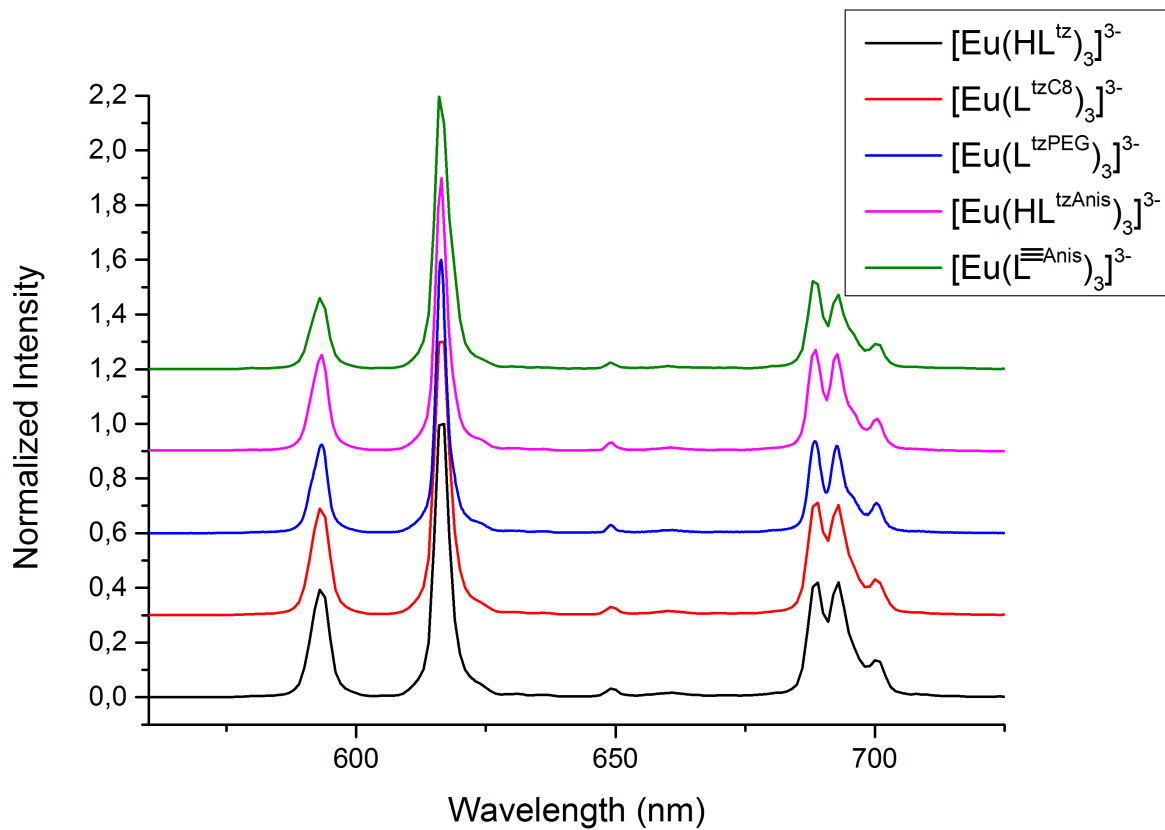

Figure S 27. Normalized emission spectra of the europium complexes of all the ligands in methanol.

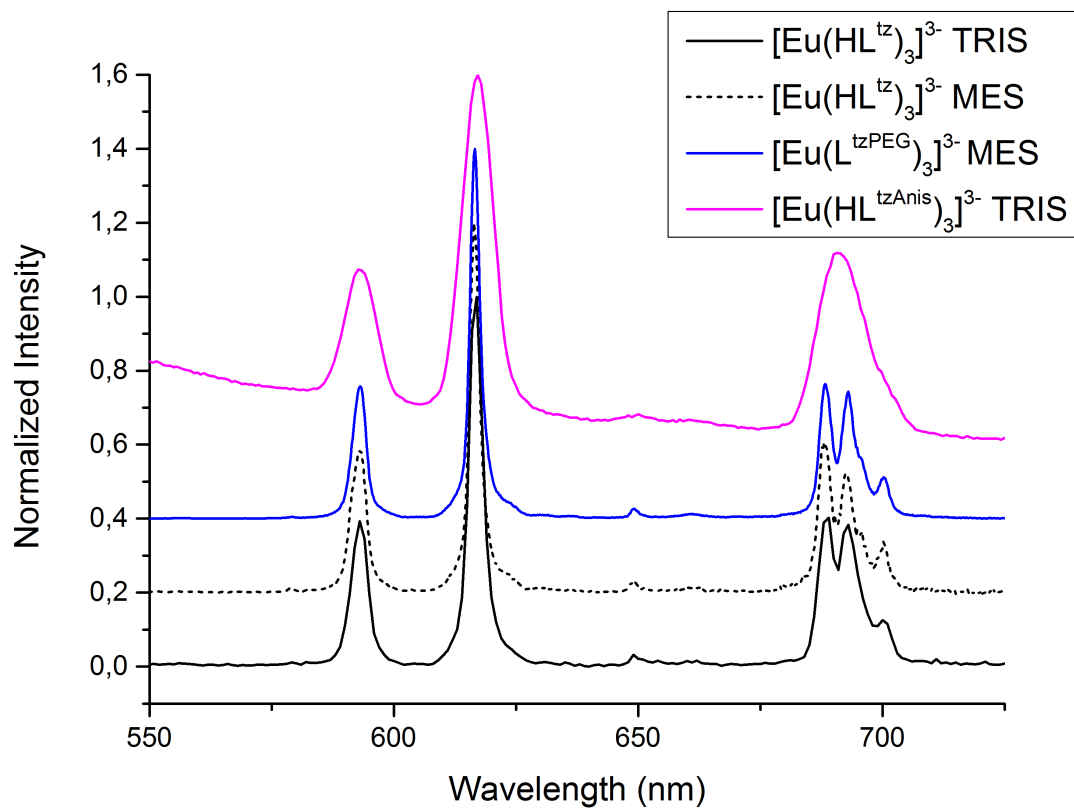

Figure S 28. Normalized emission spectra of europium complexes of  $\text{L}^{\text{tz}}$ ,  $\text{L}^{\text{tzPEG}}$  and  $\text{L}^{\text{tzAnis}}$  in MES/TRIS buffer.

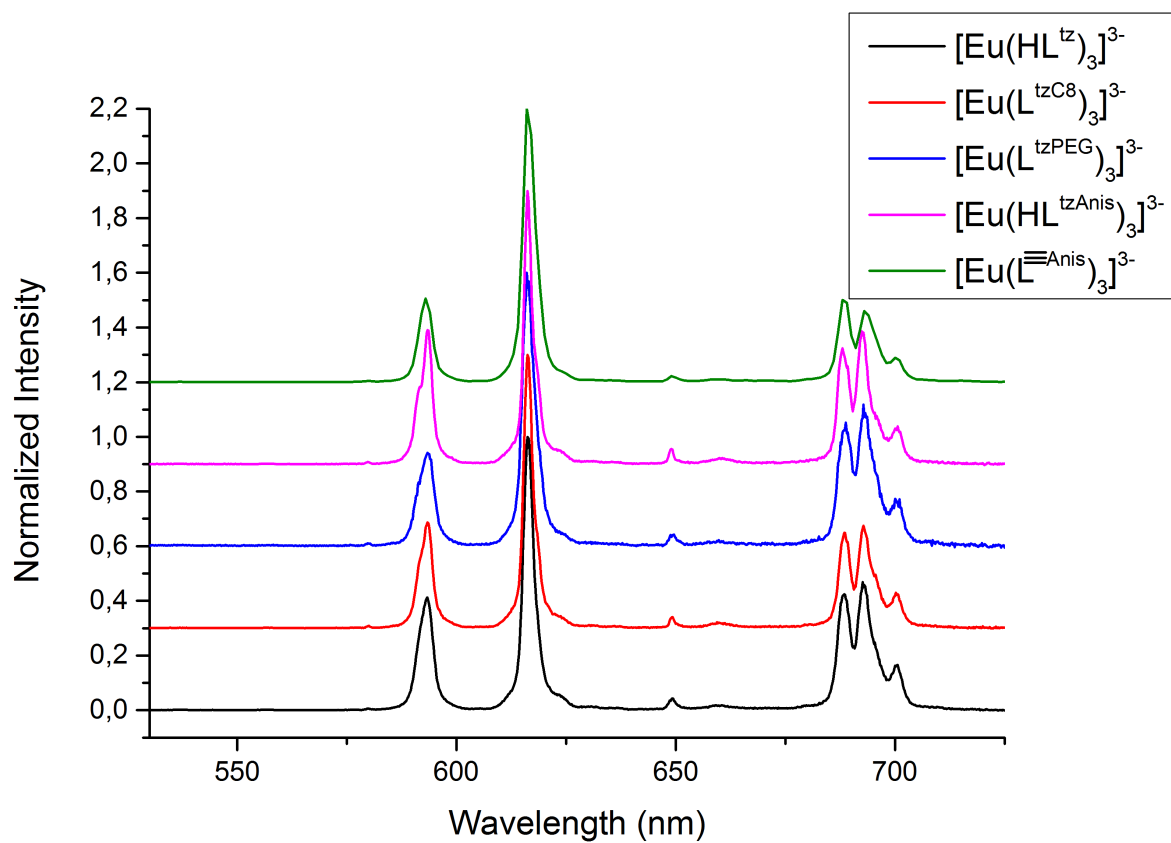

Figure S 29. Normalized emission spectra of the europium complexes of all the ligands in solid state.

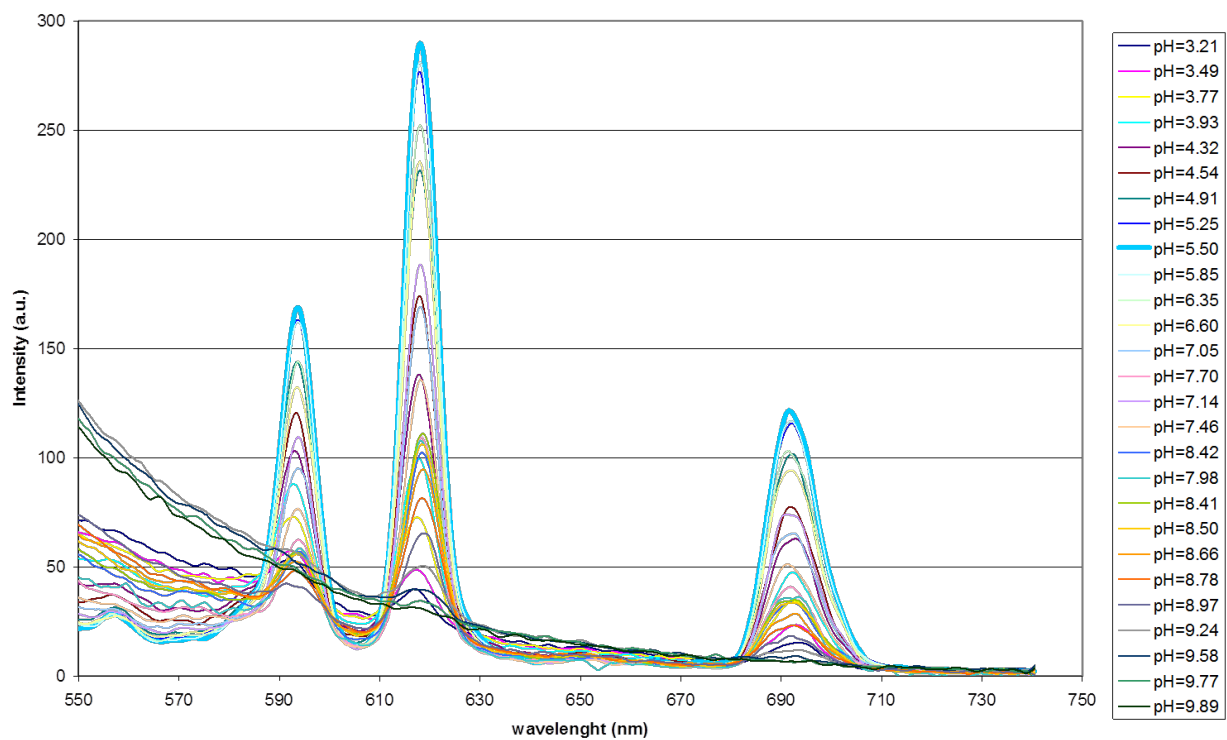

Figure S 30. Emission spectra of  $[\text{Eu}(\text{HL}^{\text{tz}})]_3[\text{Et}_3\text{NH}]_3$  in water as a function of pH ( $2.5 \cdot 10^{-5} \text{ M}$ ,  $I = \text{KCl } 1 \text{ M}$ ).
